# Supplementary material
Source: ML conference proceedings conference paper supplement (https://aclanthology.org/D18-1130)
Supplement: Attachment [file D18-1130.Attachment.pdf]

---

# Improved Entity Tracking Supplementary Material

---

**Model Hyperparameters** In addition to those described in the main paper, we use the following hyperparameters in our experiments, which we obtained via random search:

|                             | dim | clip | dropout | $\beta_1$ | $\eta$ | ent types | ent tokens |
|-----------------------------|-----|------|---------|-----------|--------|-----------|------------|
| Lamb, AttSum-Feat           | 300 | 10   | 0.4     | 0.9       | 0.0005 | -         | -          |
| Lamb, AttSum-Feat + $L^1$   | 100 | 10   | 0.2     | 0.7       | 0.001  | 5         | 100        |
| Lamb, AttSum-Feat + $L^2$   | 128 | 1    | 0.4     | 0.7       | 0.001  | 2         | 2          |
| CBT-NE, AttSum-Feat         | 300 | 10   | 0.1     | 0.7       | 0.0005 | -         | -          |
| CBT-NE, AttSum-Feat + $L^1$ | 256 | 10   | 0.2     | 0.9       | 0.001  | 3         | 3          |
| CBT-NE, AttSum-Feat + $L^2$ | 256 | 10   | 0.5     | 0.9       | 0.001  | 2         | 2          |

We elaborate on these below:

1. dim: The dimensionality of word embeddings and RNN states
2. clip: Gradients were rescaled to not exceed this value in norm
3. dropout: Dropout rate
4.  $\beta_1$ : ADAM hyperparameter
5.  $\eta$  ADAM learning rate
6. ent types: distinct named entity word types allowed in multi-task loss
7. ent tokens: named entity word tokens used in multi-task loss

We used a batch-size of 64 in all experiments, initialized all parameters to lie uniformly in  $[-0.1, 0.1]$ , and set  $\gamma = 0.5$  for all multi-task experiments. We used (at most) the last 1024 tokens in each LAMBADA example in defining  $x$ , and at most the last 1500 tokens in each CBT-NE example in defining  $x$ .

**Training Details** We sort the examples by length in descending order and the mini-batches are taken as continuous chunks from this set (but at random index in each epoch).

**Speaker Id** To heuristically determine the speaker, we use the following pseudo-code rules:

```
if a quote doesn't end with a '.':
    if there is a PERSON w/ in the 10 tokens following the end of the quote:
        the speaker is the closest PERSON following the end of the quote
    else:
        the speaker is the closest PERSON that precedes the beginning of the quote
else:
    the speaker is the closest PERSON that precedes the beginning of the quote
```

**Statistical Significance Test** We use McNemar's test on 3 different types of comparisons and list the  $p$ -values obtained below (values greater than 0.05 are highlighted in red):

1. AttSum\* vs AttSum, in table 1
2. AttSum-Feat +  $\mathcal{L}^i$  vs AttSum +  $\mathcal{L}^i$ , in table 2
3. AttSum-Feat +  $\mathcal{L}^i$  vs AttSum-Feat, in table 3

| LAMBADA                       | Val      | Test     |
|-------------------------------|----------|----------|
| AttSum + $\mathcal{L}^1$      | 1.43e-05 | 1.44e-02 |
| AttSum + $\mathcal{L}^2$      | 1.27e-04 | 1.66e-03 |
| AttSum-Feat                   | 8.93e-11 | 3.59e-11 |
| AttSum-Feat + $\mathcal{L}^1$ | 1.49e-13 | 1.58e-11 |
| AttSum-Feat + $\mathcal{L}^2$ | 1.17e-12 | 2.83e-07 |
| CBT-NE                        |          |          |
| AttSum + $\mathcal{L}^1$      | 3.91e-02 | 1.02e-02 |
| AttSum + $\mathcal{L}^2$      | 3.72e-03 | 1.09e-03 |
| AttSum-Feat                   | 9.78e-05 | 4.66e-03 |
| AttSum-Feat + $\mathcal{L}^1$ | 3.52e-06 | 1.54e-07 |
| AttSum-Feat + $\mathcal{L}^2$ | 3.37e-08 | 5.53e-03 |

Table 1:  $p$ -values for performance comparison against AttSum

| LAMBADA                       | Val      | Test            |
|-------------------------------|----------|-----------------|
| AttSum-Feat + $\mathcal{L}^1$ | 7.91e-04 | 5.49e-06        |
| AttSum-Feat + $\mathcal{L}^2$ | 2.43e-04 | 3.11e-02        |
| CBT-NE                        |          |                 |
| AttSum-Feat + $\mathcal{L}^1$ | 1.51e-02 | 7.07e-03        |
| AttSum-Feat + $\mathcal{L}^2$ | 3.37e-03 | <b>8.49e-01</b> |

Table 2:  $p$ -values for performance comparison of AttSum-Feat +  $\mathcal{L}^i$  against AttSum +  $\mathcal{L}^i$

| LAMBADA                       | Val             | Test            |
|-------------------------------|-----------------|-----------------|
| AttSum-Feat + $\mathcal{L}^1$ | <b>2.67e-01</b> | <b>7.51e-01</b> |
| AttSum-Feat + $\mathcal{L}^2$ | <b>3.57e-01</b> | <b>2.71e-01</b> |
| CBT-NE                        |                 |                 |
| AttSum-Feat + $\mathcal{L}^1$ | <b>4.93e-01</b> | 7.42e-03        |
| AttSum-Feat + $\mathcal{L}^2$ | <b>5.90e-02</b> | <b>1.0</b>      |

Table 3:  $p$ -values for performance comparison of AttSum-Feat +  $\mathcal{L}^i$  against AttSum-Feat
